# Supplementary material for: Clinical and Economic Burden of Hyperkalemia: A Nationwide Hospital-Based Cohort Study in Japan
Source: PubMed Central journal article supplement — Kidney Med. 2020 Oct 17;2(6):742–752.e1. doi: 10.1016/j.xkme.2020.09.003 (PMC7729225; doi:10.1016/j.xkme.2020.09.003), 2020-10-17
Supplement: mmc1.pdf [file mmc1.pdf]

**Figure S1. Flow diagram of patient inclusion in the study**

**A Overall cohort**

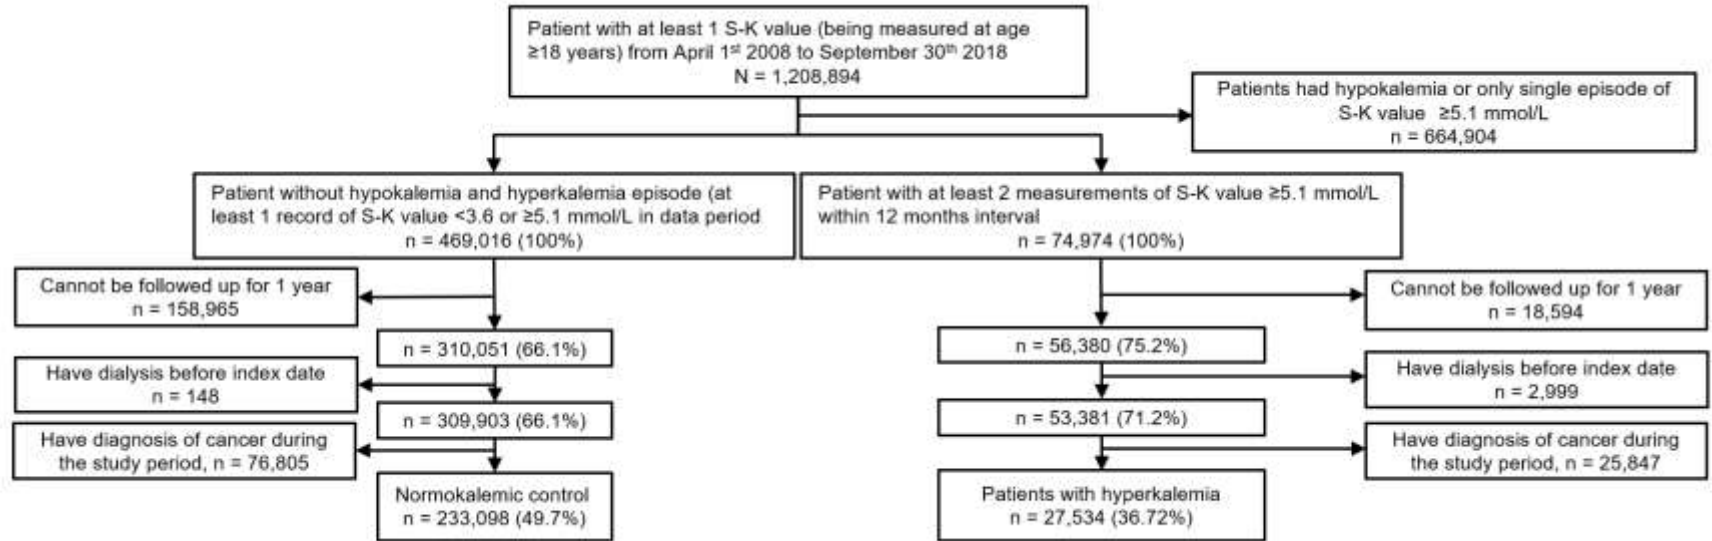

**B CKD cohort**

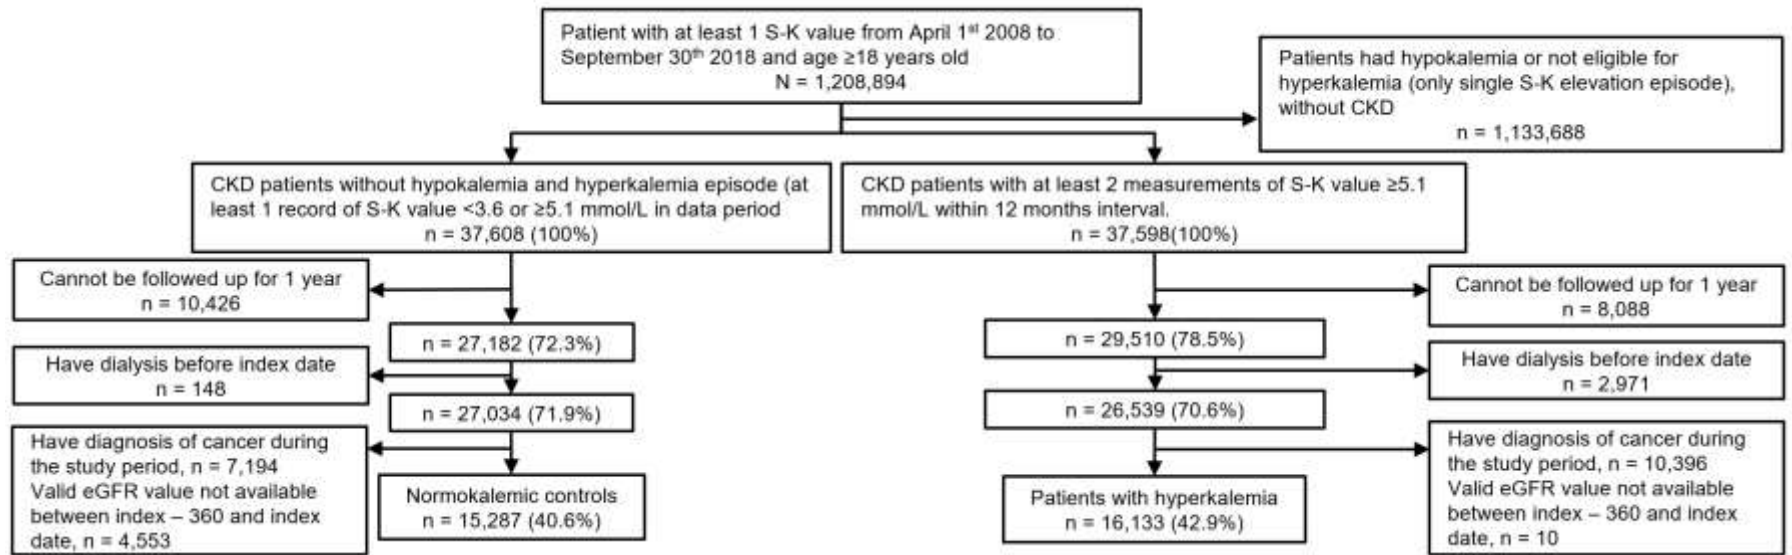

**C HF cohort**

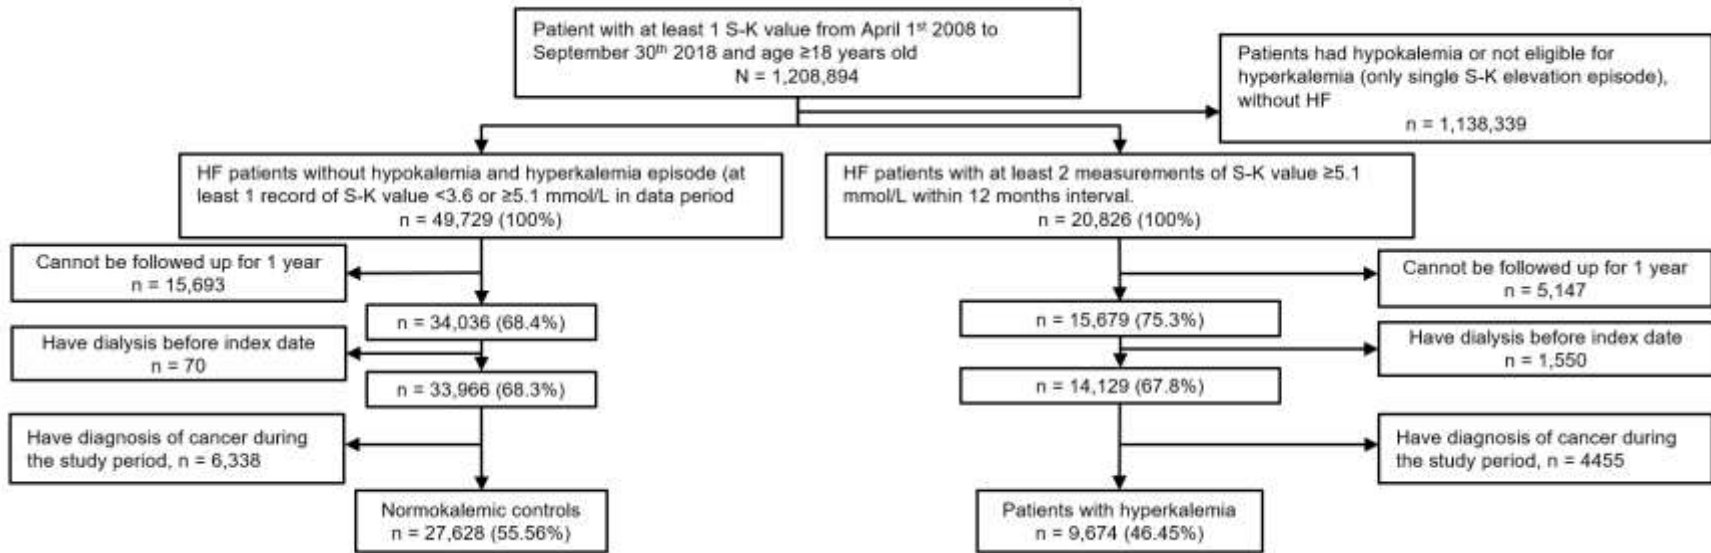

**D Cohort of patients without CKD or HF**

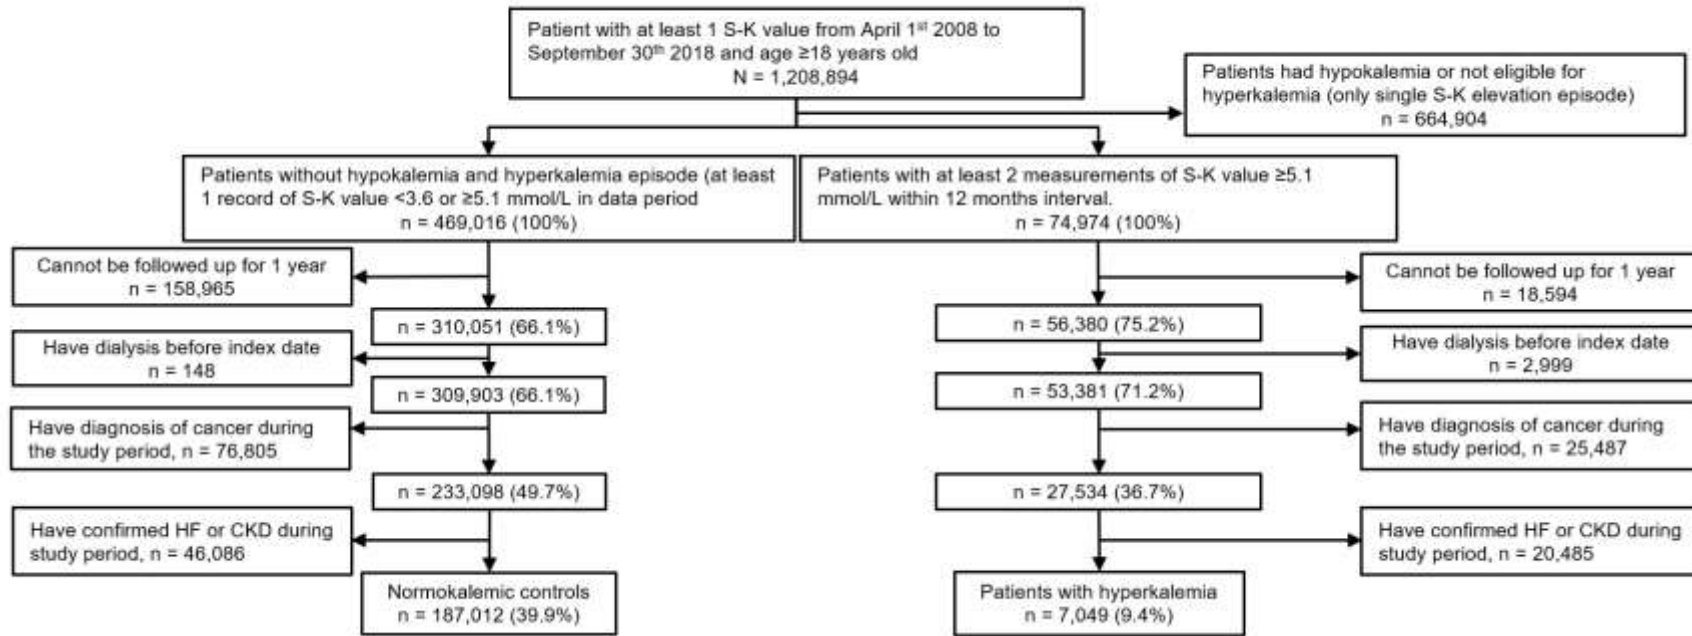

CKD, chronic kidney disease; HF, heart failure; S-K, serum potassium.

**Figure S2. Cumulative healthcare cost within 12 months in cohorts with or without CKD or HF.**

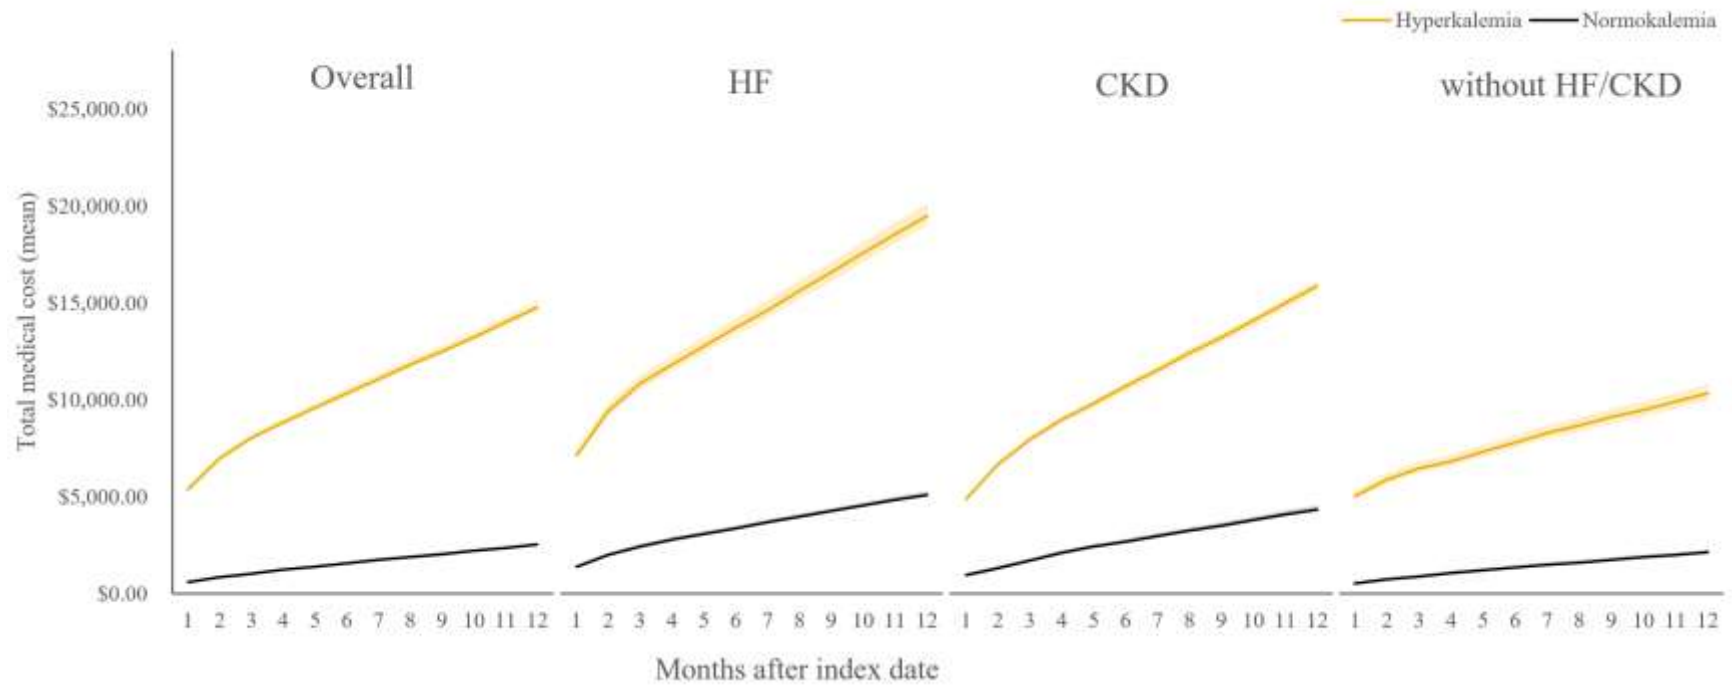

CKD, chronic kidney disease; HF, heart failure; S-K, serum potassium.

**Figure S3. Cumulative healthcare cost per patient within 12 months in patients with CKD stage 4–5.**

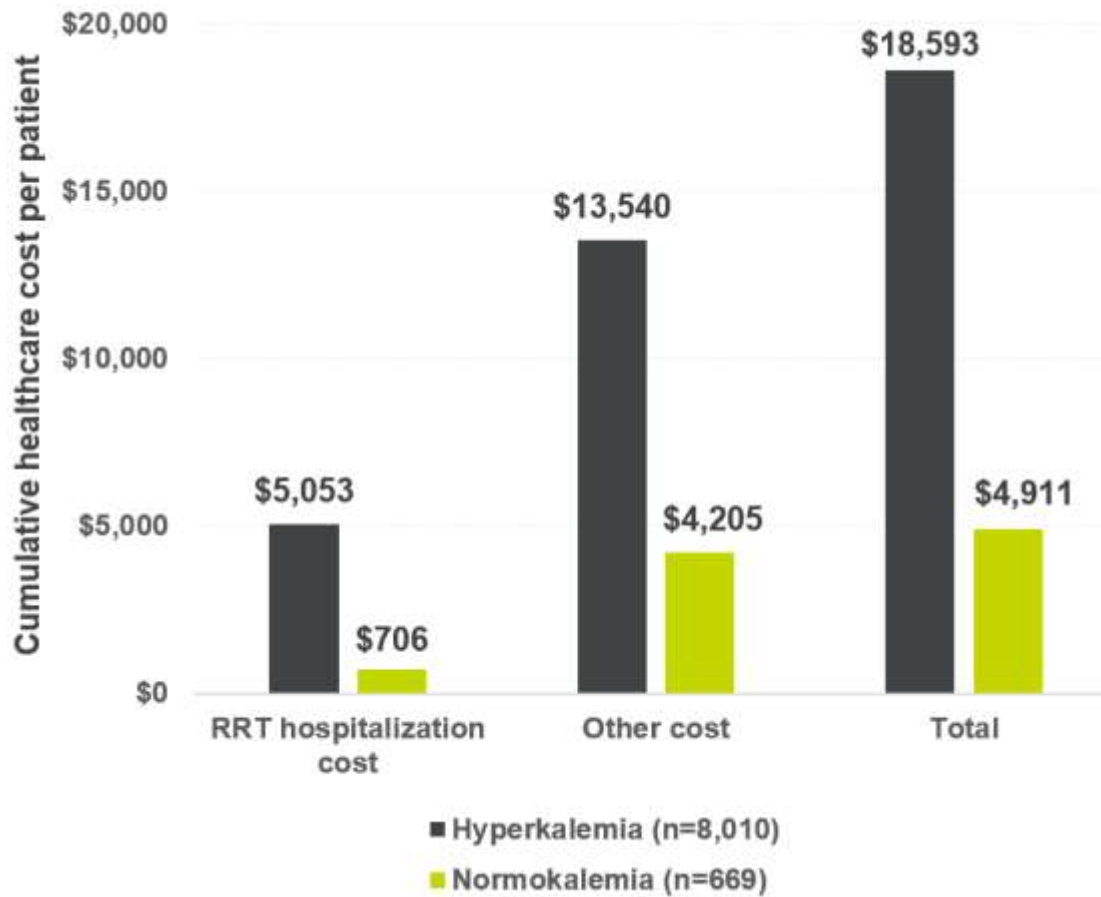

CKD, chronic kidney disease; RRT, renal replacement therapy.

Item S1. STROBE Statement—checklist of items that should be included in reports of observational studies

|                           | <b>Item No.</b> | <b>Recommendation</b>                                                                                                                                                                                                                                                                                                                                                                                                                                                  | <b>Page No.</b> | <b>Relevant text from manuscript</b>                                      |
|---------------------------|-----------------|------------------------------------------------------------------------------------------------------------------------------------------------------------------------------------------------------------------------------------------------------------------------------------------------------------------------------------------------------------------------------------------------------------------------------------------------------------------------|-----------------|---------------------------------------------------------------------------|
| <b>Title and abstract</b> | 1               | (a) Indicate the study’s design with a commonly used term in the title or the abstract                                                                                                                                                                                                                                                                                                                                                                                 | 2               | Design: Observational retrospective cohort study...                       |
|                           |                 | (b) Provide in the abstract an informative and balanced summary of what was done and what was found                                                                                                                                                                                                                                                                                                                                                                    | 2               | Structured abstract                                                       |
| <b>Introduction</b>       |                 |                                                                                                                                                                                                                                                                                                                                                                                                                                                                        |                 |                                                                           |
| Background/rationale      | 2               | Explain the scientific background and rationale for the investigation being reported                                                                                                                                                                                                                                                                                                                                                                                   | 4               | Introduction                                                              |
| Objectives                | 3               | State specific objectives, including any prespecified hypotheses                                                                                                                                                                                                                                                                                                                                                                                                       | 4               | Line 94: In this study...                                                 |
| <b>Methods</b>            |                 |                                                                                                                                                                                                                                                                                                                                                                                                                                                                        |                 |                                                                           |
| Study design              | 4               | Present key elements of study design early in the paper                                                                                                                                                                                                                                                                                                                                                                                                                | 5               | Line 112: Study design and patient selection                              |
| Setting                   | 5               | Describe the setting, locations, and relevant dates, including periods of recruitment, exposure, follow-up, and data collection                                                                                                                                                                                                                                                                                                                                        | 5               | Line 113: This was a retrospective cohort study...                        |
| Participants              | 6               | (a) <i>Cohort study</i> —Give the eligibility criteria, and the sources and methods of selection of participants. Describe methods of follow-up<br><i>Case-control study</i> —Give the eligibility criteria, and the sources and methods of case ascertainment and control selection. Give the rationale for the choice of cases and controls<br><i>Cross-sectional study</i> —Give the eligibility criteria, and the sources and methods of selection of participants | 5               | Line 113: We extracted patients aged...                                   |
|                           |                 | (b) <i>Cohort study</i> —For matched studies, give matching criteria and number of exposed and unexposed<br><i>Case-control study</i> —For matched studies, give matching criteria and the number of controls per case                                                                                                                                                                                                                                                 | 7               | Line 161: To measure the differences in healthcare costs...               |
| Variables                 | 7               | Clearly define all outcomes, exposures, predictors, potential confounders, and effect modifiers. Give diagnostic criteria, if applicable                                                                                                                                                                                                                                                                                                                               | 6               | Line 131: Covariates and health economic outcome                          |
| Data sources/measurement  | 8*              | For each variable of interest, give sources of data and details of methods of assessment (measurement). Describe comparability of assessment methods if there is more than one group                                                                                                                                                                                                                                                                                   | 5               | Line 104: Data source<br>Line 131: Covariates and health economic outcome |
| Bias                      | 9               | Describe any efforts to address potential sources of bias                                                                                                                                                                                                                                                                                                                                                                                                              | 7               | Line 161: To measure the differences...<br>Line 171: In addition...       |

---

|            |    |                                           |   |                            |
|------------|----|-------------------------------------------|---|----------------------------|
| Study size | 10 | Explain how the study size was arrived at | 8 | Line 186: We identified... |
|------------|----|-------------------------------------------|---|----------------------------|

---

Continued on next page



|                        |     |                                                                                                                                                                                                                                                                                                           |           |                                                                                                                                                                          |
|------------------------|-----|-----------------------------------------------------------------------------------------------------------------------------------------------------------------------------------------------------------------------------------------------------------------------------------------------------------|-----------|--------------------------------------------------------------------------------------------------------------------------------------------------------------------------|
| Quantitative variables | 11  | Explain how quantitative variables were handled in the analyses. If applicable, describe which groupings were chosen and why                                                                                                                                                                              | 7         | Line 155: Statistical analysis                                                                                                                                           |
| Statistical methods    | 12  | (a) Describe all statistical methods, including those used to control for confounding                                                                                                                                                                                                                     | 7         | Line 155: Statistical analysis                                                                                                                                           |
|                        |     | (b) Describe any methods used to examine subgroups and interactions                                                                                                                                                                                                                                       | 7         | Line 158: Hyperkalemia patients were stratified...                                                                                                                       |
|                        |     | (c) Explain how missing data were addressed                                                                                                                                                                                                                                                               | N.A.      | We did not conduct any imputations for missing data. The limitations of using secondary data is described as study limitations in the discussion part.                   |
|                        |     | (d) <i>Cohort study</i> —If applicable, explain how loss to follow-up was addressed<br><i>Case-control study</i> —If applicable, explain how matching of cases and controls was addressed<br><i>Cross-sectional study</i> —If applicable, describe analytical methods taking account of sampling strategy | N.A.      | Because this is a retrospective cohort study using secondary data, we did not make effort to address the lost of follow up from database.                                |
|                        |     | (e) Describe any sensitivity analyses                                                                                                                                                                                                                                                                     | N.A.      | We did not conduct sensitivity analysis, instead we conducted stratified analysis and propensity score-matching to adjust the effect of confounders as much as possible. |
| <b>Results</b>         |     |                                                                                                                                                                                                                                                                                                           |           |                                                                                                                                                                          |
| Participants           | 13* | (a) Report numbers of individuals at each stage of study—eg numbers potentially eligible, examined for eligibility, confirmed eligible, included in the study, completing follow-up, and analysed                                                                                                         | 8         | Line 186: We identified...                                                                                                                                               |
|                        |     | (b) Give reasons for non-participation at each stage                                                                                                                                                                                                                                                      | 8         | Line 187: After excluding...                                                                                                                                             |
|                        |     | (c) Consider use of a flow diagram                                                                                                                                                                                                                                                                        | Figure S1 | Study flow diagram is depicted in the supplementary material.                                                                                                            |
| Descriptive data       | 14* | (a) Give characteristics of study participants (eg demographic, clinical, social) and information on exposures and potential confounders                                                                                                                                                                  | 8         | Line 194: Baseline characteristics of...                                                                                                                                 |
|                        |     | (b) Indicate number of participants with missing data for each variable of interest                                                                                                                                                                                                                       | N.A.      | N.A.                                                                                                                                                                     |
|                        |     | (c) <i>Cohort study</i> —Summarise follow-up time (eg, average and total amount)                                                                                                                                                                                                                          | Table 1   | Lengths of follow up                                                                                                                                                     |
| Outcome data           | 15* | <i>Cohort study</i> —Report numbers of outcome events or summary measures over time                                                                                                                                                                                                                       | 8         | Results                                                                                                                                                                  |
|                        |     | <i>Case-control study</i> —Report numbers in each exposure category, or summary measures of exposure                                                                                                                                                                                                      | N.A.      | N.A.                                                                                                                                                                     |
|                        |     | <i>Cross-sectional study</i> —Report numbers of outcome events or summary measures                                                                                                                                                                                                                        | N.A.      | N.A.                                                                                                                                                                     |

|              |    |                                                                                                                                                                                                              |   |                                                                                                                                                                 |
|--------------|----|--------------------------------------------------------------------------------------------------------------------------------------------------------------------------------------------------------------|---|-----------------------------------------------------------------------------------------------------------------------------------------------------------------|
| Main results | 16 | (a) Give unadjusted estimates and, if applicable, confounder-adjusted estimates and their precision (eg, 95% confidence interval). Make clear which confounders were adjusted for and why they were included | 8 | Described in the results section. For instance, we used 95% confidence intervals to present the estimated values.                                               |
|              |    | (b) Report category boundaries when continuous variables were categorized                                                                                                                                    | 8 | Described in the results section. For instance, the severity of hyperkalemia was categorized based on the serum potassium values.                               |
|              |    | (c) If relevant, consider translating estimates of relative risk into absolute risk for a meaningful time period                                                                                             | 8 | Described in the results section. For instance, the results were described as X-fold higher as well as absolute cost differences with 95% confidence intervals. |

Continued on next page

|                          |    |                                                                                                                                                                            |    |                                                                                                                                                                           |
|--------------------------|----|----------------------------------------------------------------------------------------------------------------------------------------------------------------------------|----|---------------------------------------------------------------------------------------------------------------------------------------------------------------------------|
| Other analyses           | 17 | Report other analyses done—eg analyses of subgroups and interactions, and sensitivity analyses                                                                             | 8  | Described in the results section. For instance, we provided subgroup analysis based on the CKD stages and subgroup based on the number of repeated hyperkalemic episodes. |
| <b>Discussion</b>        |    |                                                                                                                                                                            |    |                                                                                                                                                                           |
| Key results              | 18 | Summarise key results with reference to study objectives                                                                                                                   | 11 | Line 253: In this study...                                                                                                                                                |
| Limitations              | 19 | Discuss limitations of the study, taking into account sources of potential bias or imprecision. Discuss both direction and magnitude of any potential bias                 | 13 | Line 310: Several limitations should...                                                                                                                                   |
| Interpretation           | 20 | Give a cautious overall interpretation of results considering objectives, limitations, multiplicity of analyses, results from similar studies, and other relevant evidence | 14 | Line 326: Finally, since this was an observational study...                                                                                                               |
| Generalisability         | 21 | Discuss the generalisability (external validity) of the study results                                                                                                      | 13 | Line 318: Data were collected...                                                                                                                                          |
| <b>Other information</b> |    |                                                                                                                                                                            |    |                                                                                                                                                                           |
| Funding                  | 22 | Give the source of funding and the role of the funders for the present study and, if applicable, for the original study on which the present article is based              | 15 | Line 348: Financial disclosure                                                                                                                                            |

\*Give information separately for cases and controls in case-control studies and, if applicable, for exposed and unexposed groups in cohort and cross-sectional studies.

**Note:** An Explanation and Elaboration article discusses each checklist item and gives methodological background and published examples of transparent reporting. The STROBE checklist is best used in conjunction with this article (freely available on the Web sites of PLoS Medicine at <http://www.plosmedicine.org/>, Annals of Internal Medicine at <http://www.annals.org/>, and Epidemiology at <http://www.epidem.com/>). Information on the STROBE Initiative is available at [www.strobe-statement.org](http://www.strobe-statement.org).

**Table S1. Definitions of high-risk subgroups**

| <b>Subgroup</b>        | <b>Definition</b>                                                                                                                                                                                                                                                                                                                                                                                                                                                                                                                                                                                                                                                                                                                                                                                                                                                                                                                                                |
|------------------------|------------------------------------------------------------------------------------------------------------------------------------------------------------------------------------------------------------------------------------------------------------------------------------------------------------------------------------------------------------------------------------------------------------------------------------------------------------------------------------------------------------------------------------------------------------------------------------------------------------------------------------------------------------------------------------------------------------------------------------------------------------------------------------------------------------------------------------------------------------------------------------------------------------------------------------------------------------------|
| Chronic kidney disease | Defined as either a diagnosis of chronic nephritic syndrome (ICD-10 code: N03), glomerular disease (N05-N08), chronic kidney disease/chronic renal failure (N18-N19), diabetic nephropathy (E102, E112, E122, E132, E142), or hypertension with renal failure (I120, I13), or the presence of an average eGFR of $<60 \text{ mL}\cdot\text{min}^{-1}\cdot 1.73 \text{ m}^{-2}$<br>CKD stage 1: $\text{eGFR} \geq 90 \text{ mL}\cdot\text{min}^{-1}\cdot 1.73 \text{ m}^{-2}$ , stage 2: $\text{eGFR} 60\text{-}89 \text{ mL}\cdot\text{min}^{-1}\cdot 1.73 \text{ m}^{-2}$ , stage 3a: $\text{eGFR} 45\text{-}59 \text{ mL}\cdot\text{min}^{-1}\cdot 1.73 \text{ m}^{-2}$ , stage 3b: $\text{eGFR} 30\text{-}44 \text{ mL}\cdot\text{min}^{-1}\cdot 1.73 \text{ m}^{-2}$ , stage 4: $\text{eGFR} 15\text{-}29 \text{ mL}\cdot\text{min}^{-1}\cdot 1.73 \text{ m}^{-2}$ , and stage 5: $\text{eGFR} < 15 \text{ mL}\cdot\text{min}^{-1}\cdot 1.73 \text{ m}^{-2}$ |
| Diabetes mellitus      | Defined as a diagnosis of DM (E10-E14)                                                                                                                                                                                                                                                                                                                                                                                                                                                                                                                                                                                                                                                                                                                                                                                                                                                                                                                           |
| Heart failure          | Defined as a diagnosis of heart failure (I50, I110)                                                                                                                                                                                                                                                                                                                                                                                                                                                                                                                                                                                                                                                                                                                                                                                                                                                                                                              |
| Hypertension           | Defined as a diagnosis of hypertension (I10-I15)                                                                                                                                                                                                                                                                                                                                                                                                                                                                                                                                                                                                                                                                                                                                                                                                                                                                                                                 |

ICD-10, International Classification of Diseases 10th revision; eGFR, estimated glomerular filtration rate; DM, diabetes mellitus

**Table S2. List of comorbidities**

| <b>Condition</b>                                              | <b>ICD-10 code</b>                                                                                                                                                                         |
|---------------------------------------------------------------|--------------------------------------------------------------------------------------------------------------------------------------------------------------------------------------------|
| Myocardial infarction                                         | I21; I22; I23; I24                                                                                                                                                                         |
| Peripheral vascular disease                                   | I70; I71; I72; I73; I74; I77                                                                                                                                                               |
| Cerebrovascular disease                                       | I60-I69; G45                                                                                                                                                                               |
| Chronic pulmonary disease                                     | J40-J47; J60-J67; J684; J701; J703; J841; J920; J961; J982; J983                                                                                                                           |
| Moderate to severe liver disease                              | B150; B160; B162; B190; K704; K72; K766; I85                                                                                                                                               |
| Atrial fibrillation or atrial flutter                         | I48                                                                                                                                                                                        |
| Valvular heart disease                                        | I00-I02; I05-I09; I34; I35; I36; I37; Q20-Q25;                                                                                                                                             |
| Alcoholism-related or other substance-abuse related disorders | T36-T65; F10-F19; G312; G612; G721; I426; K292; K860; K70; R780; T51; Z714; Z721                                                                                                           |
| Acute kidney injury                                           | N17                                                                                                                                                                                        |
| Sepsis                                                        | A021, A207, A227, A241, A267, A282, A327, A394, A400-A403, A409-A415, A418-A419, A427, A548, B007, B349, B377, D71, I301, I330, J020, J209, J950, L029, L080, M8699, O080, O753, O85, O883 |
| Gastrointestinal bleeding                                     | K250, K252, K254, K256, K260, K262, K264, K266, K284, K290, K571, K573                                                                                                                     |
| Gastrointestinal perforation                                  | K251, K252, K255, K256, K261, K265, K266, K285, K570, K572                                                                                                                                 |
| Peripheral edema                                              | R600                                                                                                                                                                                       |

ICD-10, International Classification of Diseases 10th revision;

**Table S3. Drug and non-drug treatment for renal disease stratified by CKD stages**

|                                                   | CKD stage 3a |              | CKD stage 3b |              | CKD stage 4  |              | CKD stage 5  |              |
|---------------------------------------------------|--------------|--------------|--------------|--------------|--------------|--------------|--------------|--------------|
|                                                   | Hyperkalemia | Normokalemia | Hyperkalemia | Normokalemia | Hyperkalemia | Normokalemia | Hyperkalemia | Normokalemia |
| <i>Within 12 months</i>                           |              |              |              |              |              |              |              |              |
| N                                                 | 2,655        | 6,586        | 4,128        | 2,345        | 4,745        | 430          | 3,265        | 239          |
| Erythropoietin stimulating agent, n (%)           | 69 (3)**     | 14 (0.2)     | 337 (8)**    | 26 (1)       | 1,365 (29)** | 38 (9)       | 2,047 (63)** | 28 (12)      |
| Prescription days per year, Mean±SD               | 5.4±4.7      | 5.1±4.0      | 5.2±4.5      | 5.2±3.0      | 6.6±5.0      | 6.4±4.3      | 9.3±10.1*    | 4.9±3.9      |
| Healthcare cost per patient per year, \$, Mean±SD | 928±1,554    | 686±429      | 759±1,021    | 785±504      | 942±1,030    | 888±1,127    | 1,128±1,144* | 701±684      |
| Phosphate binder, n (%)                           | 1 (0.0)      | 3 (0.1)      | 9 (0.2)*     | 0 (0)        | 86 (2)*      | 0 (0)        | 950 (29)**   | 18 (8)       |
| Prescription days per year, Mean±SD               | 62           | 138.3±95.7   | 135.7±118.7  | n/a          | 121.3±106.0  | n/a          | 139.1±126.4* | 36.1±82.2    |
| Healthcare cost per patient per year, \$, Mean±SD | 115          | 428±574      | 435±686      | n/a          | 182±411      | n/a          | 342±783      | 45±64        |
| Active vitamin D, n (%)                           | 136 (5)      | 302 (5)      | 234 (6)*     | 172 (7)      | 358 (8)      | 33 (8)       | 785 (24)**   | 18 (8)       |
| Prescription days per patient per year, Mean±SD   | 228.2±135.0  | 262.6±120.8  | 217.7±136.0* | 250.5±124.3  | 187.5±133.9* | 264.2±121.4  | 152.8±130.9  | 151.3±154.6  |
| Healthcare cost per patient per year, \$, Mean±SD | 114±108*     | 155±131      | 106±109*     | 144±146      | 73±90**      | 146±126      | 46±112       | 80±127       |
| Uremic toxin absorbent, n (%)                     | 29 (1)**     | 16 (0.2)     | 174 (4)**    | 28 (1)       | 800 (17)**   | 32 (7)       | 738 (23)**   | 12 (5)       |
| Prescription days per year, Mean±SD               | 199.5±130.1  | 208.4±132.3  | 226.4±121.2  | 259.0±131.2  | 220.6±120.4  | 254.3±127.0  | 180.5±124.9* | 105.3±129.1  |
| Healthcare cost per patient per year, \$, Mean±SD | 825±826      | 783±851      | 1,136±789    | 1,136±794    | 1,110±756    | 1,311±843    | 948±784      | 655±790      |
| Sodium bicarbonate, n (%)                         | 636 (24)**   | 897 (14)     | 1,010 (24)** | 305 (13)     | 1,335 (28)** | 60 (14.0)    | 1,847 (57)** | 57 (24)      |
| Prescription days per year, Mean±SD               | 116.4±136.5  | 99.5±138.0   | 114.3±137.5  | 101.4±136.2  | 106.1±128.6  | 99.5±136.5   | 80.9±113.8   | 61.7±110.7   |
| Healthcare cost per patient per year, \$, Mean±SD | 22±42**      | 16±25        | 22±41*       | 16±27        | 27±66        | 11±21        | 99±212*      | 37±69        |
| Potassium binder, n (%)                           | 357 (13)**   | 2 (0.0)      | 824 (20)**   | 8 (0.3)      | 1,632 (34)** | 9 (2)        | 1,345 (41)** | 6 (3)        |
| Prescription days                                 | 133.1±128.1  | 54.5±51.6    | 137.7±132.5* | 268.5±138.6  | 142.7±130.3* | 230.4±129.1  | 130.8±125.9  | 72.0±128.3   |

|                                                      |               |             |               |             |               |             |                |             |
|------------------------------------------------------|---------------|-------------|---------------|-------------|---------------|-------------|----------------|-------------|
| per year, Mean±SD                                    |               |             |               |             |               |             |                |             |
| Healthcare cost per patient per year, \$, Mean±SD    | 217±271       | 49±49       | 222±267       | 338±228     | 241±288       | 422±280     | 213±263        | 141±271     |
| Hospitalization for renal replacement therapy, n (%) | 12 (0.5)**    | 1 (0.0)     | 33 (1)**      | 0 (0)       | 181 (4)**     | 3 (1)       | 1,257 (39)**   | 38 (16)     |
| Number of hospitalizations per year, Mean±SD         | 1.0±0.0       | 1           | 1.1±0.2       | n/a         | 1.2±0.5       | 1.0±0.0     | 1.6±1.1        | 1.3±0.5     |
| Healthcare cost per hospitalization, \$, Mean±SD     | 88,279±83,690 | 13,653      | 29,210±33,394 | n/a         | 21,816±25,373 | 9,761±1,132 | 14,739±18,436* | 8,394±5,804 |
| <b>After 12 months</b>                               |               |             |               |             |               |             |                |             |
| N                                                    | 2,495         | 6,550       | 3,735         | 2,313       | 4,090         | 402         | 2,652          | 221         |
| Erythropoietin stimulating agent, n (%)              | 182 (7)**     | 32 (0.5)    | 676 (18)**    | 63 (3)      | 1,774 (43)**  | 42 (10)     | 1,368 (52)**   | 11 (5)      |
| Prescription days per year, Mean±SD                  | 3.9±5.4       | 3.8±3.6     | 4.2±4.9       | 3.3±3.3     | 6.0±6.0       | 5.3±5.0     | 8.0±10.8       | 4.8±4.7     |
| Healthcare cost per patient per year, \$, Mean±SD    | 655±1,680     | 747±1,033   | 667±1,051     | 496±597     | 854±906       | 832±1,710   | 898±1,085      | 899±1,033   |
| Phosphate binder, n (%)                              | 33 (1)**      | 5 (0.1)     | 110 (3)**     | 4 (0.2)     | 520 (13)**    | 3 (1)       | 1,117 (42)**   | 18 (8)      |
| Prescription days per year, Mean±SD                  | 62.5±67.2     | 72.7±66.4   | 68.6±82.3     | 16.7±17.1   | 97.8±100.4    | 73.7±44.5   | 131.9±132.5**  | 22.5±52.7   |
| Healthcare cost per patient per year, \$, Mean±SD    | 156±261       | 161±314     | 264±761       | 48±90       | 280±606       | 28±28       | 572±1,097*     | 25±36       |
| Active vitamin D, n (%)                              | 198 (8)**     | 387 (6)     | 373 (10)*     | 186 (8)     | 722 (18)*     | 47 (12)     | 909 (34)**     | 24 (11)     |
| Prescription days per patient per year, Mean±SD      | 166.6±135.4** | 206.2±134.9 | 154.4±131.1** | 205.3±137.0 | 136.3±117.8   | 170.9±130.9 | 139.3±129.3    | 131.8±155.3 |
| Healthcare cost per patient per year, \$, Mean±SD    | 82±101**      | 124±123     | 69±90**       | 116±130     | 43±63**       | 85±94       | 37±95          | 74±126      |
| Uremic toxin absorbent, n (%)                        | 70 (3)**      | 31 (0.5)    | 336 (9)**     | 58 (3)      | 922 (23)**    | 43 (11)     | 400 (15)**     | 4 (2)       |
| Prescription days per year, Mean±SD                  | 121.6±118.6   | 161.9±117.7 | 156.4±119.6   | 165.6±126.5 | 164.9±121.7   | 187.1±123.7 | 148.4±120.0    | 196.8±180.4 |
| Healthcare cost per patient per year, \$, Mean±SD    | 595±607       | 672±647     | 711±629       | 687±658     | 802±654       | 951±649     | 765±675        | 989±978     |
| Sodium bicarbonate, n                                | 745 (30)**    | 1,269 (19)  | 1,212 (32)**  | 382 (17)    | 1,727 (42)**  | 73 (18)     | 1,397 (53)**   | 62 (28)     |

|                                                      |               |            |               |             |               |             |               |             |
|------------------------------------------------------|---------------|------------|---------------|-------------|---------------|-------------|---------------|-------------|
| (%)                                                  |               |            |               |             |               |             |               |             |
| Prescription days per year, Mean±SD                  | 83.7±118.0*   | 71.7±117.7 | 84.6±116.5    | 76.2±116.8  | 80.8±109.0    | 77.6±122.4  | 59.8±96.3     | 54.9±105.2  |
| Healthcare cost per patient per year, \$, Mean±SD    | 19±40**       | 11±21      | 22±86*        | 12±22       | 43±149        | 9±19        | 106±330*      | 11±22       |
| Potassium binder, n (%)                              | 507 (20)**    | 8 (0.1)    | 1,057 (28)**  | 13 (1)      | 1,732 (42)**  | 7 (2)       | 947 (36)**    | 2 (0.9)     |
| Prescription days per year, Mean±SD                  | 130.3±122.6*  | 33.8±31.2  | 137.9±122.8   | 175.2±170.3 | 134.7±121.6   | 162.6±147.7 | 108.4±117.0   | 136.8±191.2 |
| Healthcare cost per patient per year, \$, Mean±SD    | 207±249       | 63±63      | 217±241       | 206±236     | 222±255       | 284±297     | 175±243       | 314±441     |
| Hospitalization for renal replacement therapy, n (%) | 54 (2)**      | 2 (0.0)    | 172 (5)**     | 1 (0.0)     | 716 (18)**    | 2 (0.5)     | 1,252 (47)**  | 23 (10)     |
| Number of hospitalizations per year, Mean±SD         | 0.6±0.7       | 0.3±0.1    | 0.7±0.8       | 0.9         | 0.8±0.7       | 0.4±0.1     | 1.0±0.9*      | 0.6±0.3     |
| Healthcare cost per hospitalization, \$, Mean±SD     | 15,279±21,947 | 4,372±866  | 17,420±20,673 | 13,950      | 12,776±16,748 | 5,804±1,561 | 11,309±13,980 | 8,983±7,885 |

\*p <0.05, \*\* p <0.001 vs. Normokalemic control by ANOVA for continuous variables and chi-squared test or Fisher’s exact test for categorical variables.  
CKD, chronic kidney disease; SD, standard deviation;



**Table S4. Patient characteristics of propensity-score matched cohort of hyperkalemia and normokalemic controls**

|                                       | Hyperkalemia<br>(N=5,859) | Normokalemia<br>(N=5,859) | Standardized Difference |
|---------------------------------------|---------------------------|---------------------------|-------------------------|
| Age                                   |                           |                           |                         |
| Mean±SD                               | 71±13                     | 71±12                     | 0.019                   |
| Age group, n (%)                      |                           |                           |                         |
| 18-64                                 | 1,567 (27)                | 1,504 (26)                |                         |
| 65-79                                 | 2,710 (46)                | 2,786 (48)                | 0.029                   |
| 80+                                   | 1,582 (27)                | 1,569 (27)                |                         |
| Gender, male, n (%)                   | 3,423 (58)                | 3,398 (58)                | 0.009                   |
| Lengths of follow up (months)         |                           |                           |                         |
| Mean±SD                               | 43.0±24.4                 | 43.6±22.0                 | 0.023                   |
| Serum potassium value at index date   |                           |                           |                         |
| Mean±SD                               | 5.3±0.3                   | 4.3±0.3                   | 3.462                   |
| Serum potassium value group, n (%)    |                           |                           |                         |
| ≥5.1 and <5.5 mmol/L                  | 4,619 (79)                | 0 (0)                     |                         |
| ≥5.5 and <6.0 mmol/L                  | 1,021 (17)                | 0 (0)                     |                         |
| ≥6.0 and <6.5 mmol/L                  | 170 (3)                   | 0 (0)                     |                         |
| ≥6.5 and <7.0 mmol/L                  | 30 (0.5)                  | 0 (0)                     |                         |
| ≥7.0 mmol/L                           | 19 (0.3)                  | 0 (0)                     |                         |
| CKD, n (%)                            | 5,859 (100)               | 5,859 (100)               | 0                       |
| Stage 1                               | 195 (3)                   | 194 (3)                   |                         |
| Stage 2                               | 1,091 (19)                | 1,070 (18)                |                         |
| Stage 3a                              | 2,264 (39)                | 2,301 (39)                |                         |
| Stage 3b                              | 1,745 (30)                | 1,770 (30)                | 0.032                   |
| Stage 4                               | 394 (7)                   | 379 (6)                   |                         |
| Stage 5                               | 170 (3)                   | 145 (2)                   |                         |
| HF, n (%)                             | 1,548 (26)                | 1,575 (27)                | 0.010                   |
| Diabetes, n (%)                       | 2,887 (49)                | 2,876 (49)                | 0.004                   |
| Hypertension, n (%)                   | 4,158 (71)                | 4,206 (72)                | 0.018                   |
| Dyslipidemia, n (%)                   | 1,970 (34)                | 2,011 (34)                | 0.015                   |
| Charleston comorbidity index, Mean±SD | 1.0±1.1                   | 1.1±1.1                   | 0.019                   |
| RAASi treatment, n (%)                | 2,718 (46)                | 2,754 (47)                | 0.012                   |
| ACEi                                  | 501 (9)                   | 404 (7)                   | 0.062                   |

|                           |            |            |       |
|---------------------------|------------|------------|-------|
| ARB                       | 2,145 (37) | 2,341 (40) | 0.069 |
| MRA                       | 586 (10)   | 297 (5)    | 0.188 |
| Thiazide diuretics, n (%) | 98 (2)     | 188 (3)    | 0.010 |
| Loop diuretics, n (%)     | 563 (10)   | 475 (8)    | 0.053 |

---

\*Standardized difference >0.1 was considered as non-negligible difference. SD, standard deviation; CKD, chronic kidney disease; HF, heart failure; RAASi, renin-angiotensin-aldosterone system inhibitor; ACEi, angiotensin converting enzyme inhibitor; ARB, angiotensin receptor blocker; MRA, mineralcorticoid receptor antagonist.
